# Supplementary material
Source: Springer Nature journal article supplement (https://www.springermedizin.de/resource/supplementary/12936_2012_2163_MOESM4_ESM.pdf/9542698)

0 50 100 200 Kilometers

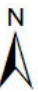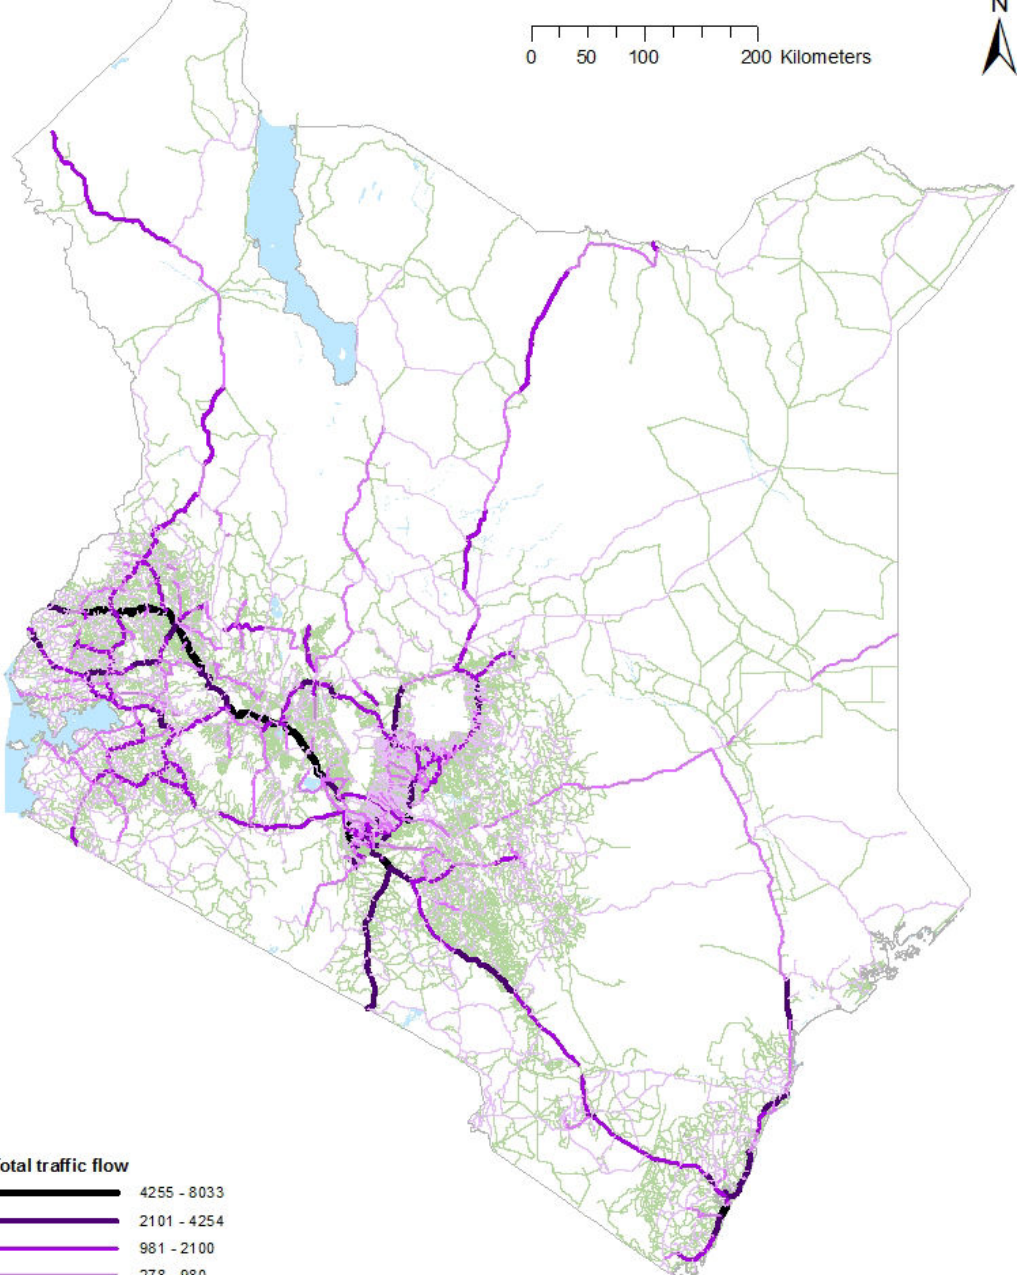

**Total traffic flow**

-  4255 - 8033
-  2101 - 4254
-  981 - 2100
-  278 - 980
-  0 - 277
-  Underlying Road Network
-  Waterbodies

Supplement: MOESM4 [file 9542698]
